# Supplementary material
Source: Research Square preprint supplement (doi:10.21203/rs.3.rs-9955756/v1)
Supplement: Supplementary file 1 [file figure1_compact_overview.pdf › paper/figures/figure1_compact_overview.pdf]

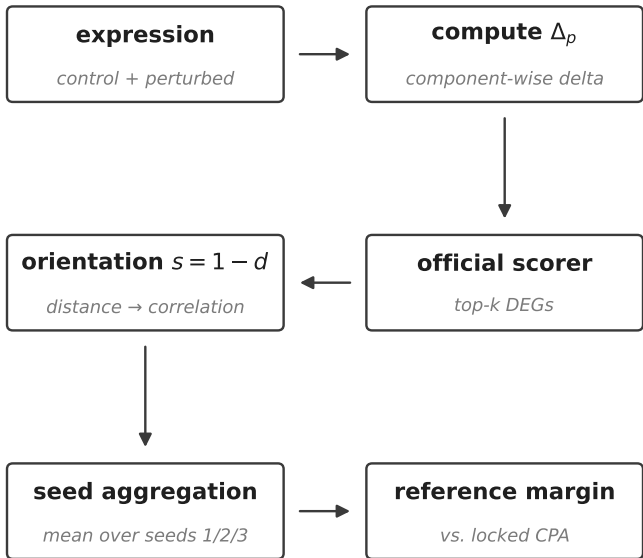

### Metric-calibrated replay protocol

$$S_{\text{TCPE}} = \text{mean}_m \text{mean}_p (1 - d_{p,m}^{(k)}); \text{margin} = S_{\text{TCPE}} - S_{\text{CPA}}$$
