# Supplementary material
Source: Research Square preprint supplement (doi:10.21203/rs.3.rs-9955756/v1)

**A****Response delta**

Cells  $c_p$  stimulated,  $c_0$  control

$$\Delta_{p,g} = \bar{X}_{c_p,g} - \bar{X}_{c_0,g}$$

Predicted:  $\hat{\Delta}_{p,g}$  from imputed cells

top- $k$  DEGs:  $G_p^{(k)} = \text{argtop}_k |\Delta_{p,\cdot}|$

Vector form:  $\Delta_p, \hat{\Delta}_p \in \mathbb{R}^k$

**B****Metric-calibrated replay**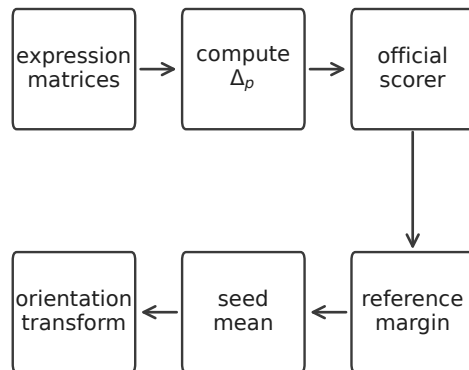**C****Evidence levels****Primary**

Replogle\_K562essential  
official replay (PCC-delta top100)

**Secondary**

RPE1 reconstructed protocol  
lower-95 confidence robustness gate

**Contextual**

Blind455 internal screen  
validation evidence only

**D****Reference margin**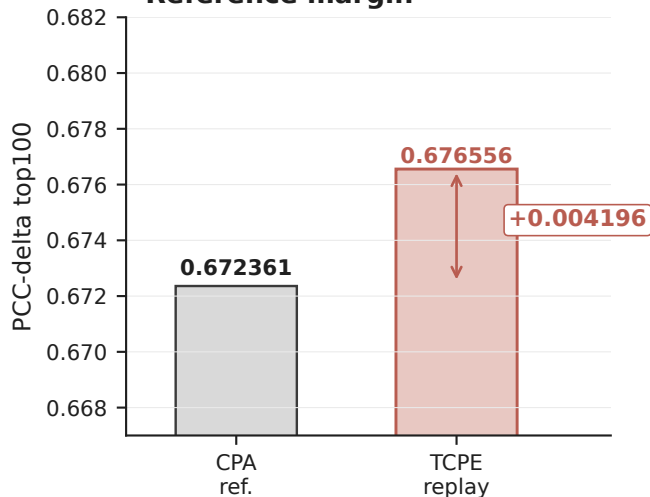

Supplement: Supplementary file 2 [file figure1_framework_overview.pdf › paper/figures/figure1_framework_overview.pdf]
