# Supplementary material
Source: Research Square preprint supplement (doi:10.21203/rs.3.rs-9955756/v1)

Single perturbation: AHCY

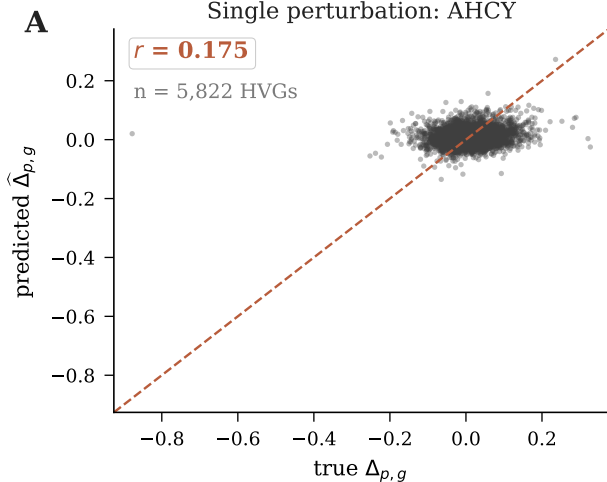

All perturbations density (seed 1)

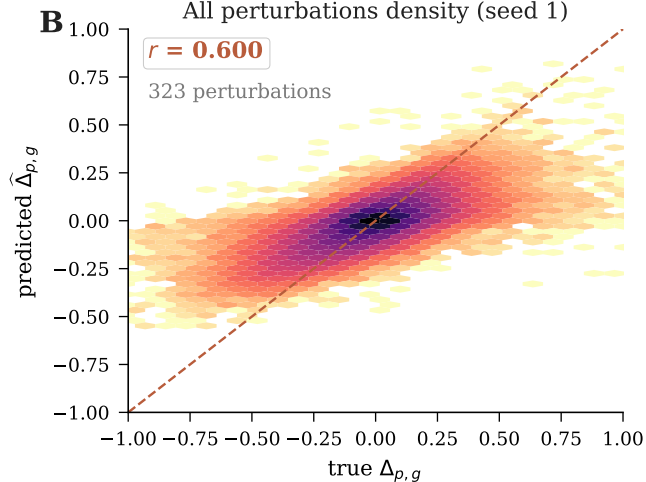Per-perturbation  $r$  distribution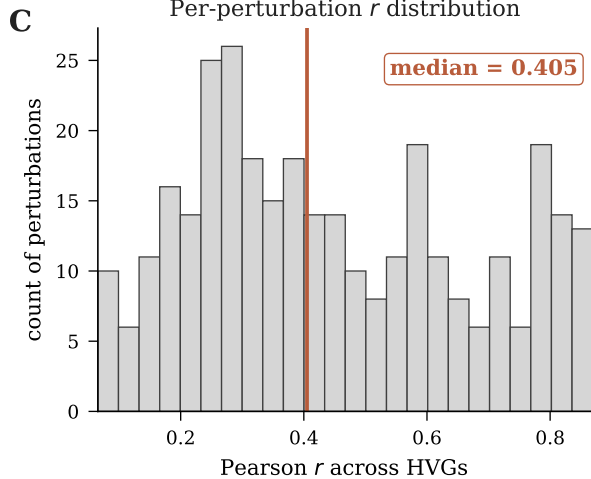Per-perturbation  $r$  ranked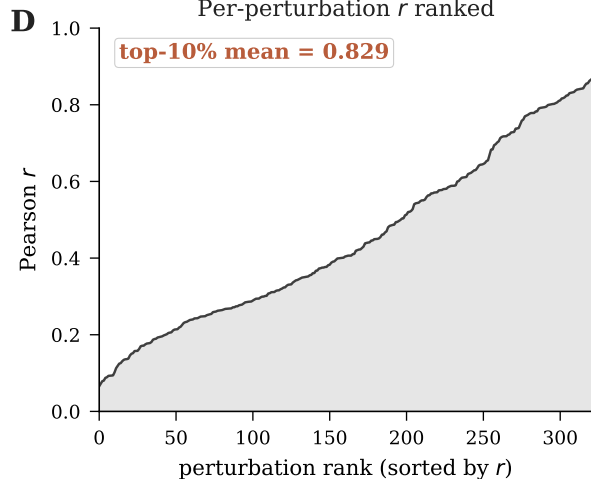

Supplement: Supplementary file 6 [file figure5_real_gene_level_scatter.pdf › paper/figures/figure5_real_gene_level_scatter.pdf]
