# Supplementary material
Source: Research Square preprint supplement (doi:10.21203/rs.3.rs-9955756/v1)

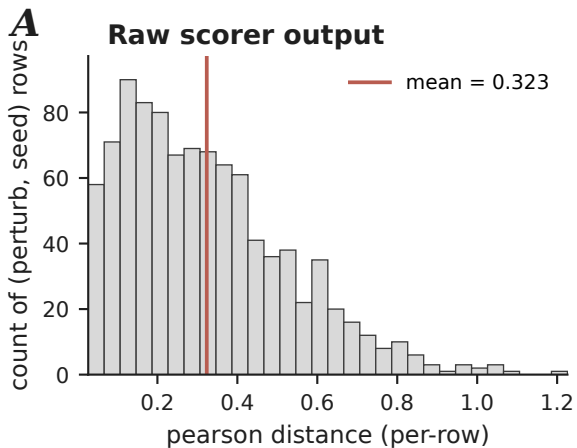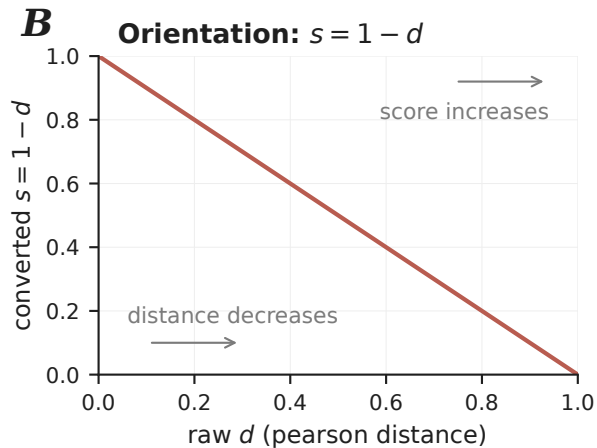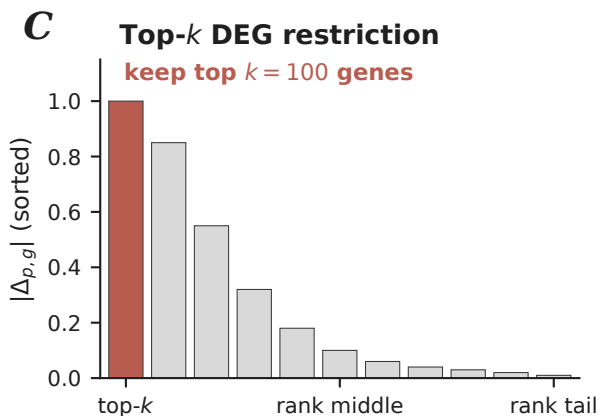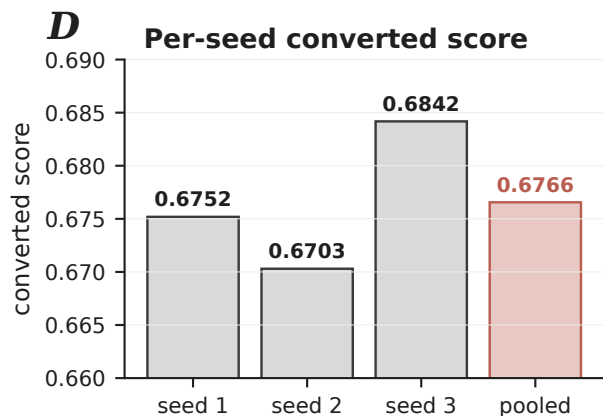

Supplement: Supplementary file 3 [file figure2_metric_orientation_analysis.pdf › paper/figures/figure2_metric_orientation_analysis.pdf]

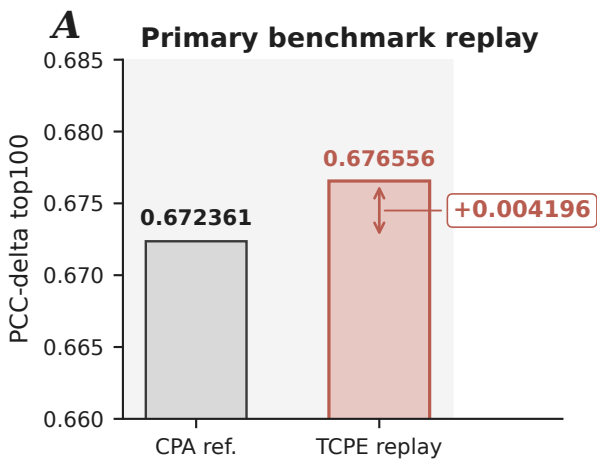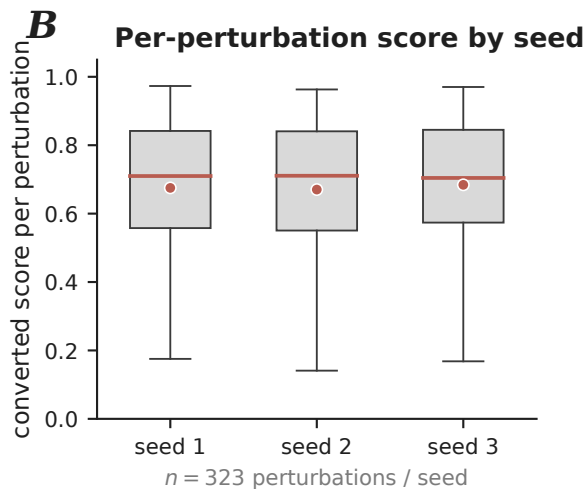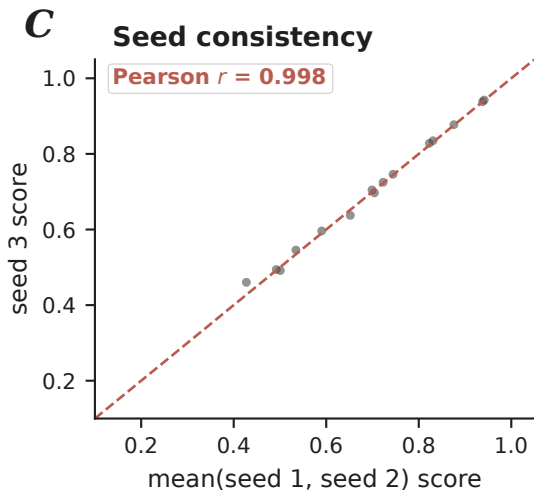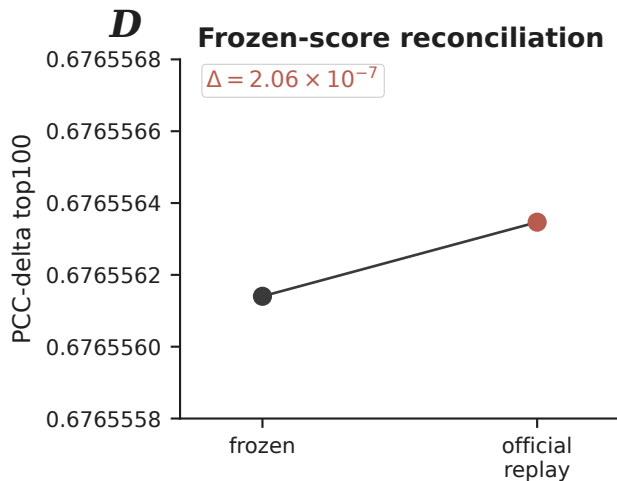

Supplement: Supplementary file 4 [file figure3_main_benchmark_reconciliation.pdf › paper/figures/figure3_main_benchmark_reconciliation.pdf]

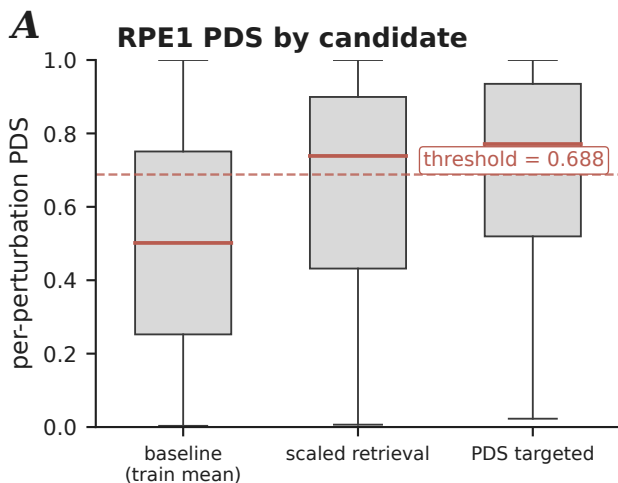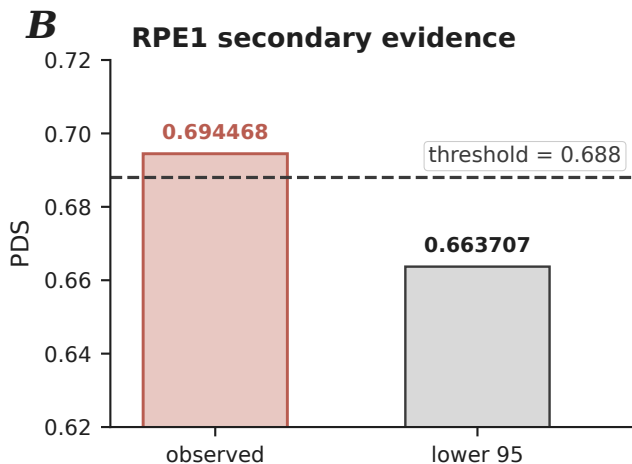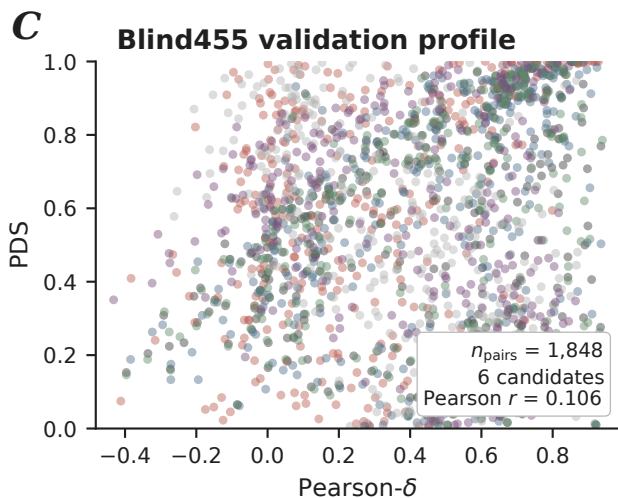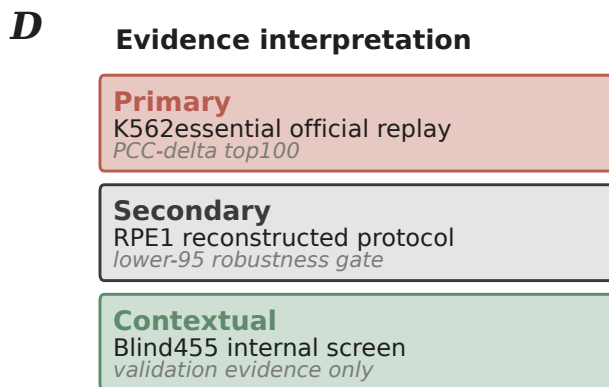

Supplement: Supplementary file 5 [file figure4_secondary_reconstructed_protocol.pdf › paper/figures/figure4_secondary_reconstructed_protocol.pdf]
